# Supplementary figures and images for: Discovery of a Novel Coronavirus in Swedish Bank Voles (Myodes glareolus)
Source: MDPI journal article supplement (doi:10.3390/v14061205), 2022-06-01

**Figure S1** Conserved domains on the hemagglutinin esterase (A) and spike (B) of Grimso virus.

A

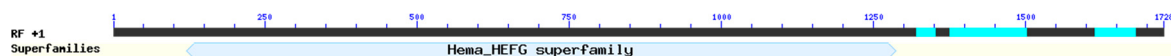

B

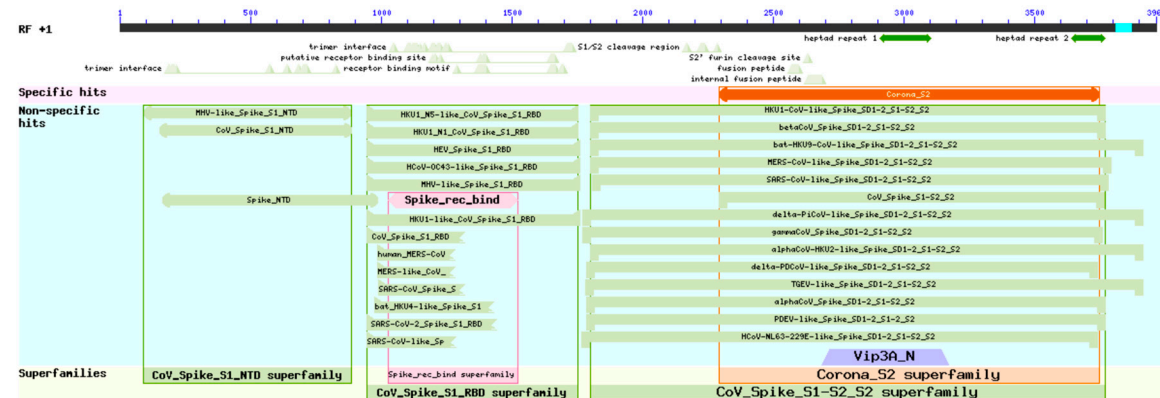

Supplement: s1 [file s1]
